# Supplementary material for: Evaluation of a fully automated high-throughput SARS-CoV-2 multiplex qPCR assay with build-in screening functionality for DelHV69/70- and N501Y variants such as B.1.1.7
Source: bioRxiv or medRxiv preprint supplement (doi:10.1101/2021.02.12.21251614), 2021-02-18
Supplement: Supplementary file [file media-1.pdf]

# Supplementary table 1

| <u>Cross-reactivity Panel</u>                          |   |          |          |          |          |
|--------------------------------------------------------|---|----------|----------|----------|----------|
| Species                                                | - | N501Y    | SC2-S    | S-DEL    | SC2-N    |
| Influenza A H1N1 pdm09 ( <i>A/California/60/2008</i> ) |   | Negative | Negative | Negative | Negative |
| Influenza B Victoria ( <i>B/Brisbane/60/2008</i> )     |   | Negative | Negative | Negative | Negative |
| RSV A                                                  |   | Negative | Negative | Negative | Negative |
| MERS Coronavirus                                       |   | Negative | Negative | Negative | Negative |
| hCoV - OC43                                            |   | Negative | Negative | Negative | Negative |
| Human Metapneumovirus (Subtype A)                      |   | Negative | Negative | Negative | Negative |
| Parainfluenzavirus 2                                   |   | Negative | Negative | Negative | Negative |
| Parainfluenzavirus 3                                   |   | Negative | Negative | Negative | Negative |
| Rhinovirus                                             |   | Negative | Negative | Negative | Negative |
| hCoV - HKU1 (clinical sample)                          |   | Negative | Negative | Negative | Negative |
| hCoV - NL63 (clinical sample)                          |   | Negative | Negative | Negative | Negative |
| Adenovirus (clinical sample)                           |   | Negative | Negative | Negative | Negative |
| Boca-virus (clinical sample)                           |   | Negative | Negative | Negative | Negative |
| Mycoplasma pneumoniae (clinical sample)                |   | Negative | Negative | Negative | Negative |
| Pneumocystis jirovecii (clinical sample)               |   | Negative | Negative | Negative | Negative |

## Supplementary table 2

SARS-CoV-2 "wild-type" (Accuplex Verification Panel)

| Step | cp/ml  | SC2-S: pos/rep | SC2-N: pos/rep | Overall: pos/rep |
|------|--------|----------------|----------------|------------------|
| 1    | 500.00 | 8/8            | 8/8            | 8/8              |
| 2    | 250.00 | 8/8            | 8/8            | 8/8              |
| 3    | 125.00 | 8/8            | 8/8            | 8/8              |
| 4    | 62.50  | 8/8            | 8/8            | 8/8              |
| 5    | 31.25  | 8/8            | 8/8            | 8/8              |
| 6    | 15.63  | 8/8            | 8/8            | 8/8              |
| 7    | 7.81   | 6/8            | 7/8            | 8/8              |
| 8    | 3.91   | 4/8            | 5/8            | 6/8              |
| 9    | 1.95   | 4/8            | 2/8            | 5/8              |

SARS-CoV-2 B.1.1.7 lineage (clinical sample)

| Step | cp/ml   | N501Y: pos/rep | S-Del: pos/rep | SC2-N: pos/rep | Overall: pos/rep |
|------|---------|----------------|----------------|----------------|------------------|
| 1    | 5561.00 | 8/8            | 8/8            | 8/8            | 8/8              |
| 2    | 2780.50 | 8/8            | 8/8            | 8/8            | 8/8              |
| 3    | 1390.25 | 8/8            | 8/8            | 8/8            | 8/8              |
| 4    | 695.13  | 8/8            | 8/8            | 8/8            | 8/8              |
| 5    | 347.56  | 8/8            | 8/8            | 8/8            | 8/8              |
| 6    | 173.78  | 8/8            | 8/8            | 8/8            | 8/8              |
| 7    | 86.89   | 2/8            | 7/8            | 8/8            | 8/8              |
| 8    | 43.45   | 1/8            | 7/8            | 8/8            | 8/8              |
| 9    | 21.72   | 0/8            | 2/8            | 7/8            | 7/8              |
| 10   | 10.86   | 0/8            | 1/8            | 6/8            | 6/8              |
